# Supplementary material for: Health-related quality of life of survivors of childhood acute lymphoblastic leukemia: a systematic review
Source: Springer Nature journal article supplement (doi:10.1007/s11136-018-1788-5), 2018-01-25
Supplement: MOESM1 [file 15416924]

**Health-related quality of life of survivors of childhood acute lymphoblastic leukemia: a systematic review**

Journal of Quality of Life Research

Authors: Vetsch J, Wakefield, C.E., Robertson E.G., Trahair T.N., Mateos M.K., Grootenhuis, M., Marshall G.M., Cohn R. J., Fardell J.E.

Corresponding Author:

Joanna E Fardell. Email: j.fardell@unsw.edu.au. Full postal address: Behavioural Sciences Unit, Kids Cancer Centre, Sydney Children’s Hospital, Level 1, High St, Randwick, NSW, AUSTRALIA, 2031. Ph: +612 9382 3114. Fax: +612 9382 1789.

**Supplemental Table 1.** HRQL outcomes by study

| **Authors/ Country** | **Quality scorea** | **Type of study** | **Number of participants (males/ females)** | **Mean age at study,  min.max** | **Time since treatment  if not specified as other** | **Treatment** | **Control group** | **HRQL tool** | **Proxy or self-report** | **Overall HRQL, domains of HRQL** |
| --- | --- | --- | --- | --- | --- | --- | --- | --- | --- | --- |
| Apajasalo et al 1995 [46]  Finland | 0.95 | Cross-sectional | Total 168 (106 male, 62 female), 68 ALL | 23 years (range 16-35 years) | Median 12 years | n/a | 129 adults, aged 17-35 years, randomly selected from National population register, 69 women, 60 men | 15D | Self-report | - HRQL was stat. significantly better than controls probably not be clinically relevant - ALL survivors had better sleeping, depression, vitality, distress, elimination, and discomfort than controls - Leukemia survivors had better dimensions of breathing and discomfort than solid tumor survivors - Overall no difference between malignancies |
| Badr et al 2013 [30]  United States | 0.91 | Cross-sectional | 170 (88 male, 82 female), leukemia 55 | 17.7 years (SD=5.6; range=3.3-28.9) | Time since dx: 8.6 years (SD=4.0; range=1.4-16.7) | Not reported | Healthy population (n, not provided) | Pediatric Quality of Life (PedsQL 4.0) | Self-report | - HRQL lower in CNS tumors and lymphoma survivors compared to ALL and sarcoma - ALL survivors had lower overall scores compared to healthy population - ALL survivors had greater general and cognitive fatigue to healthy population - CNS tumors and lymphoma greater general fatigue and cancer worry than leukemia and sarcoma survivors. |
| Barr et al 1993 [54]  Canada | 0.68 | Cross-sectional | Total n=55 (sex not reported)  low risk n=25, out of them n=10 very long-term survivors (15-more than 25 years)  high risk survivors n=30 | n/a | Not reported | St. Jude Study protocol 8, L2 protocol from Memorial Sloan Kettering Cancer Centre, protocols 85-01, 87-01 from Dana Faber | No | Multi-attribute health status classification system | Physician, nurse proxy | - Low risk survivors, 60% had no morbidity, very little severe morbidity and no morbidity for self-care or pain - 20% had cognitive deficits - Very long-term survivors 50% had emotional and cognitive morbidity (data not shown) |
| Barr et al 2001 [55] Canada | 0.72 | Feasibility study | 197 (gender not reported), 95 ALL | Not reported | Not reported | Not reported | No | Health Utilities Index | Physician and parent proxy | - For ALL patients, unspecified major morbidity burdens were in attributes of emotion, cognition and pain. - ALL patients had reduced morbidity burden compared to Non-Hodgkins lymphoma. - Positive correlation between proxys. - Mean scores for HUI2 were sig lower for parents than physicians responses. |
| Baytan et al [31] Turkey | 0.81 | Cross-sectional | 50, 27 females, 23 males | 15.8 years (SD 1.8 years) | Not reported | BFM-9 Protocol | Age and gender matched siblings (n=50) | PedsQL | Self-report | - Survivors poorer overall, physical and psychosocial HRQL scores than siblings |
| Chiou et al 2010 [56]  Taiwan | 0.91 | Cross-sectional | 32 (17 male, 15 female) | 13.17 (SD=2.49) | Mean age off treatment 7.47 (SD=2.37) | Nationwide protocol depending on treatment year, TPOG ALL 93, TPOG ALL 97, and TPOG ALL 2002 | Community controls: 154 (47.4% male)  Community sample: 12.36 (SD=2.13)  Non-adult sibling controls: 30 (43.3% male)  Sibling sample: 13.45 (SD=3.18) | Child Health Questionnaire 50-item Parent Form (CHQ-PF 50) | Parent proxy | - Parents reported lower HRQL than that of the community control group in several subscales of HRHRQL including physical summary and psychosocial summary. - Survivors also had lower HRHRQL than their non-adult siblings across several subscales including physical summary and psychosocial summary |
| Chou et al 2009 [47] Taiwan | 0.91 | Pilot study | Total 98 (61 male, 37 female), ALL 49, 27 males, CNS 49, 34 males | 19.67 (sd=1.18; range=18-21) | Time since dx: 6.22 (1.03) | Not reported | No | Minneapolis-Manchester quality of life (MMQL) | Self-report | - Leukemia survivors scored higher on all quality of life scales including physical functioning and psychological functioning when compared to those who survived a brain tumour |
| Eiser et al 2003 [32]  UK | 0.91 | Cross-sectional | 68 mother-survivor dyads  ALL (n=45, 28 male) CNS (n=23, 10 male) | ALL: 13.51 (3.15) CNS: 13.74 (3.06) | ALL: 9.67 (3.36) CNS: 7.23 (2.42) | MRC (Medical Research Council) or UKCCSG (United Kingdom Children’s Cancer Study Group) protocols | No | PedsQL | Self-report and parent proxy | - Survivors of ALL reported better health than CNS survivors - Survivors of ALL have better physical health than psychosocial health - Mothers reported worse proxy-HRQL than survivors, and physical health was higher than psychosocial health. - Moderate agreement in parent proxy reported HRQL and ALL survivors. Concordance was worse for physical health than psychosocial health. |
| Eiser et al 2004 [34]  UK | 0.68 | Cross-sectional | 64 (27 male, 37 female) patients 59 parents (58 mothers) 40 ALL, 24 CNS | ALL 13.45 (SD=2.91; range=9-21)   CNS tumours 14.46 (SD=2.60; range=8-19) | Not reported | Not reported | No | PedsQL | Self-report and parent proxy | - Survivors in ALL group reported higher HRQL than those in CNS group, for both self-report and parent proxy-report in physical, social, family and school domain - Parents proxy ratings correlated significantly with survivors self-ratings of HRQL. |
| Eiser et al 2005 [33]  UK | 0.91 | Cross-sectional | 77 (gender reported for diagnosis and tx) , 57 ALL, ALL no GHT (n=14): (5 male, 9 female) ALL + GHT (n=6) | ALL no GHT: 13.39 (3.19) ALL + GHT: 15.44 (3.19) CNS no GHT: 13.90 (1.97) CNS + GHT: 13.50 (3.56) | Time since dx:  ALL no GHT: 9.72 (3.50)  ALL + GHT: 10.93 (2.68)  CNS no GHT: 5.58 (1.49)  CNS + GHT: 7.75 (2.61) | Depending on treatment time UKALLX, UKALLXI | Norm population UK  (n, not provided) | PedsQL | Self-report and parent proxy | - ALL did have sig poorer overall HRQL compared to UK norm population, but not when considering physical health and psychosocial health separately. - ALL report higher HRQL than CNS tumour survivors. |
| Eiser, Greco et al 2004 [35]  UK | 0.91 | Cross-sectional | 77 (gender not reported), 49 ALL | ALL survivors: 14.14 years (SD=3.44; range=9-20)  CNS survivors: 14.33 years(SD=2.63; range=8-19) | In remission for at least 2 years (range=2-17) | Not reported | Norm population US  (n, not provided) | PedsQL; and semi-structured interview | Self-report and parent proxy | - ALL survivors did not differ compared with norm population - ALL survivors reported better HRQL than CNS survivors on all subscales (physical, emotional, social, school functioning, well-being |
| Essig et al 2012 [62]  Switzerland | 1 | Cross-sectional | 457 (229 male, 228 female) | n/a | n/a | Combinatino fo chemo and radio and BMT | Population norm  Taken from German Federal Health Survey (N=6964) | Short Form-36 | Self-report | - Compared with German population norm, survivors scores on HRQL were similar or higher, regardless of relapse status (all within 1 SD of norm) for overall HRQL and subdomains. |
| Fluchel et al 2008 [58]  Uruguay | 1 | Cross-sectional | 95 (47 male, 48 female), 49 ALL | 13.6 years (SD=4.26; range=7-27) | Free of disease for at least 2 years after completion of therapy | Combination of chemo, radio and surgery. | 96 (33.3% male)  Mean age=12.2 (SD=2.70; range=8-17) | Health Utilities Index | Self-report and parents, physicians, and teachers proxy | - ALL survivors have lower a mean HRQL utility score than control subjects - The mean score for survivors of ALL is higher than the score for survivors of brain tumors in overall HRQL, emotion and cognition - 71.4% of ALL survivors reported HRQL scores representing moderate or severe overall disability |
| Follin et al 2010 [48]  Sweden | 0.95 | Non-randomized (GH vs non-GH) prospective study - baseline and follow-up | 29 (17 male, 12 female) | 25 years (range=  19-31) | Not reported | protocols of the Nordic countries and of the Swedish Child Leukemia Group | Patients matched with a control subject: age, sex, residence (rural vs. non rural), and smoking habits (n=29) | Symptom checklist-90 | Self-report | - No sig differences in HRQL scores in GH or non GH treated groups before or after 5 and 8 years - No differences between ALL (GH and non-GH) vs. controls at baseline or after 5 and 8 years. |
| Gordijn et al 2013 [59]  Netherlands | 1 | Cross-sectional | 62 (31 male, 31 female) | 9.7 years (SD=3.2; range=5-17) | 36 months (range=22-62) | ALL-9 and ALL-10 protocols | Dutch norm  (parent reports n=353, child reports n=466) | Child Health Questionnaire (CHQ) | Self-report and parent proxy | - ALL had poorer physical HRQL than Dutch norm when parent proxy rated - ALL rated their psychosocial HRQL better compared to Dutch norm |
| Gunn et al 2013 [44]  Finland | 0.91 | Cross-sectional | 52 males, males only | 29 years (range 25-38) | 23 years (10-33) | Cyclophoshamide, testicular radiotherapy, central nervous system radiohterapy | Yes, age and gender matched controls without a history of cancer (n=56) | RAND-36 | Self-report | - ALL scored lower on physical functioning, role/emotional, emotional wellbeing, general health than controls - In comparison to standard population significantly worse on physical functioning and role/physical |
| Harila et al 2010 [43]  Finland | 1 | Cross-sectional | 74, (26 male, 48 female) | 24 years (range 17-37) | 20 years (range 10-32) | Several ALL protocols between 1972-1992, The Nordic protocols were used from 1992 | Yes, healthy young adults selected from population registry, age, gender, living area matched and Finnish population norms (n=146) | RAND-36 | Self-report | - ALL survivors scored statistically significantly better than the norms in all dimensions of RAND-36 except for the bodily pain subscale - ALL scored better than controls on the subscales of role limitations due to emotional problems, mental health and vitality, no difference between ALL and controls in general health - Irradiated group had higher scores (better HRQL)on the subscales of mental health, vitality compared to controls - No HRQL difference in irradiated non-irradiated group |
| Khan et al 2014 [45]  United States | 0.95 | Prospective cross-sectional | 162 (90 male, 72 female) for HRQL measure n=141 | 15.7 years (range 6.9-28.9) | 7.4 years (range 1.9-20.3) | Institutional protocols | No | SF-36 | Self-report | - 10% had poor HRQL on mental and physical component summary scale scores |
| Kunin-Batson et al 2014 [36]  United States | 1 | Prospective cross-sectional | 263 (120 female, 143 male) | 13.1 years (range 7.5-17.0) | Time since dx: 9 years (range 4.8-13.7) | COG legacy protocol 1922 and 1952 | Norm values (n=5972) | PedsQL 4.0 standard version | Self-report and parent-proxy | - Parent and child rating of overall HRQL rating lower than population norm data on psychosocial summary scale and school functioning subscale but not in the impaired range - Physical summary was similar to norm - Parent rating was also lower than norm for emotional functioning - No significant difference between parent and self-report except for the domains physical HRQL, parent rating was slightly lower than child self |
| Link et al 2006 [49]  Sweden | 0.86 | Cross-sectional | 44 (21 female, 23 male) | Median 24.8 years range 19.8-31.3 | Median 16.7 years  (range 6.3-23.9) | Swedish child leukaemia group protocol until 1981, after common protocols of nordic countries | Yes, random selection of aged, gender and residence matched controls (n=44) | SCL-90, AGHDA | Self-report | - Survivors had same HRQL scores as control - Six out of 44 patients and four out of 44 controls, respectively, had an AGHDA score of 11 - Emotional domain trend for being lower in ALL than controls |
| Meeske et al 2005 [50]  United States | 1 | Cross-sectional | 161, 74 male, 87 female | 18-41 years | 13.9 years (4-23 years) | n/a | United States norm  (n, not reported) | RAND SF-36 | Self-report, interview by telephone | - Across all domains fatigued survivor scores fell significantly below normative values - Non-fatigued survivors were higher than the scores of the peers in vitality, role function-emotional mental health, social functioning and mcs - HRQL scores were lowest for survivors who were both fatigued and depressed compared to only depressed or only fatigued |
| Moe et al 1997 [51]  Norway | 0.80 | Cross-sectional | 94 (52 male, 42 female) | Mean year of birth =1973 | 15-20 years post initial diagnosis | 126 IDM and 6 HDM (132=86.3%) and other (not receiving national treatment protocol=21=13.7%) | 90 controls (either siblings or first cousin) 53 males (58.9%); average year of birth is also 1973 | SF-12 | Self-report | - ALL survivors and controls were not sig different - Only the somatization score on the GHQ involving items closely related to fatigue demonstrated a significantly higher score for the ALL survivors |
| Nayiager et al 2016 [52]  Canada | 1 | Cross-sectional | 75 (41 males, 34 females) | 10-26 years, median 15 years | Time since diagnosis: 10-26 years (median 15 years) | DFCI protocols | Candian aged 16-37 (n=2432) and US aged 18-44 (n=4048) general population | HUI2 and HUI3 | Self-report | - Overall HRQL similar as Canadian and US general population - One survivor reported HRQl worse than death - Appreciable burden of morbidity for domains emotion and pain |
| Ramchandren et al 2009 [38]  United States | 0.86 | Cross-sectional | 37 (gender not reported) | 14.4 years (SD=2.8) | 7.4 years (SD 3.2) | n/a | Norm values  (n not reported) | PedsQL 4.0 Generic Core Scales | Self-report | - No impaired HRQL compared to norms |
| Reinfjell et al 2007 [37]  Norway | 0.86 | Cross-sectional study | 40 ALL (21 girls, 19 boys), 42 healthy controls, 36 mothers and 21 fathers | 11.8 years (range 8.5-15.4) | Time since dx: 7.9 years (range 4.2-12.5) | Nordic protocol | Healthy controls, similar age and gender distribution (n=42) | PedsQL 4.0 Generic core Scales | Parent proxy and self-report | - Children treated for ALL had lower scores than healthy controls overall, psychosocial and parent proxy report - Parent proxy also showed lower scores for emotional function subscale - Mother proxy was lower for social function subscale and father for school function. All showed lower scores in psychosocial health scale overall compared to physical functioning scale |
| Sadighi et al 2014 [41]  United States | 0.91 | Cross-sectional | 162 (65 female, 82 male) | 15.7 years (range 6.9-29.0) | 7.4 years (range 1.9-20.3) | Institutional protocols | No | SF-36 | Self-report | - 11/162 had impaired HRQL - Overall HRQL was within normal range |
| Shimoda et al 2008 [53]  Brazil | 0.91 | Cross-sectional | 138 (75 male, 63 female) 31 ALL | 22.8 years (13.4-40.2) | n/a | n/a | Other diagnostic groups other countries utility scores  (Central America, n=175-197)  (Uruguay, n=92-95)  (Canada, n=84) | HUI | Self-report | - 5.1% of survivors reported their overall health as poor or fair - More than one-third of the 138 consecutive survivors who participated reported some cognitive disability or pain. Approximately one-quarter reported problems with vision, speech, or emotion |
| van Litsenburg et al 2013 [57]  Netherlands | 0.91 | Cross-sectional | 33 | 9.3 (SD 3.3) | 1.5 years (0.5-3.9) | n/a | Reference population (1435 parent-proxy scores of children aged 4-13 years) | HUI3 | Parent proxy | - 61% had perfect health - 21 % had three or more affected attribute - Over 90 % of participants had no impairment on the attributes vision, ambulation, hearing, and dexterity - No stat. significant difference on overall HRQL score to reference population - ALL children had lower scores on dexterity and cognition |
| Wright et al 2003 [60]  United States | 1 | Cross-sectional | 62 ALL | 12.1 years (7.0-18.90 | 5.4 years (1.0-13.6) | DFCI 85-01, 87-01, 91-01, 95-01) | 71 healthy subjects, difference in height and weight to ALL | HUI2 and HUI3 | Parent proxy and self-report | - No difference between proxy and self-report in ALL and healthy controls - Lower overall HUI2/3, lower emotion, cognition, pain in ALL compared to healthy subjects |
| Wright et al 2005 [61]  United States | 1 | Cross-sectional | 99 (44 females, 55 males), 77 HUI, 71 of comparison group | 12.1 years (5.1-25.2) | 4.7 years (1.0-13.6) | DFCI 85-01, 87-01, 91-01, 95-01) | 71 healthy subjects | HUI2 and HUI3 | Parent proxy and self-report | - Lower overall and pain in HUI2/3 in ALL compared to healthy subject - Lower emotion, cognition in HUI3 in ALL than comparison group |
| Zeltzer et al [42]  United States | 1 | Cross-sectional | 7147, ALL 2090 | 32 years (18-54) | Survival time: 23 years (15-34) | n/a | Siblings (n=388) age and gender specific population norms | SF-36 | Self-report | - ALL survivors and siblings scored higher than norms in mental health, lower on all other aspects of HRQL (except for pain and mental component summary) - ALL survivors and siblings mean did not differ on mental score - General health subscale in ALL survivors was lower than in siblings - ALL survivors had poorer outcomes than controls on physical function, role physical, general health, vitality, role emotional and social function as well as physical component |

aQuality score calculated by total sum divided by total possible sum; total sum=number of yes*2+number of partials*1, total possible sum=28-number of n/a*2

Abbreviations: ALL, Acute lymphoblastic leukemia; CHQ, Child health questionnaire; CHQ-PF50, Child health questionnaire parent-form 50; GH, Growth Hormone; HRQL, Health related quality of life; HUI, Health Utilities Index; PedsQL, Pediatric quality of life inventory.

Note: aReported on leukemia, which was not further specified and remains unclear if AML was included as well
